# Supplementary material
Source: PubMed Central journal article supplement (PMC9264654)
Supplement: 12879_2022_7558_MOESM1_ESM.pdf [file 12879_2022_7558_MOESM1_ESM.pdf]

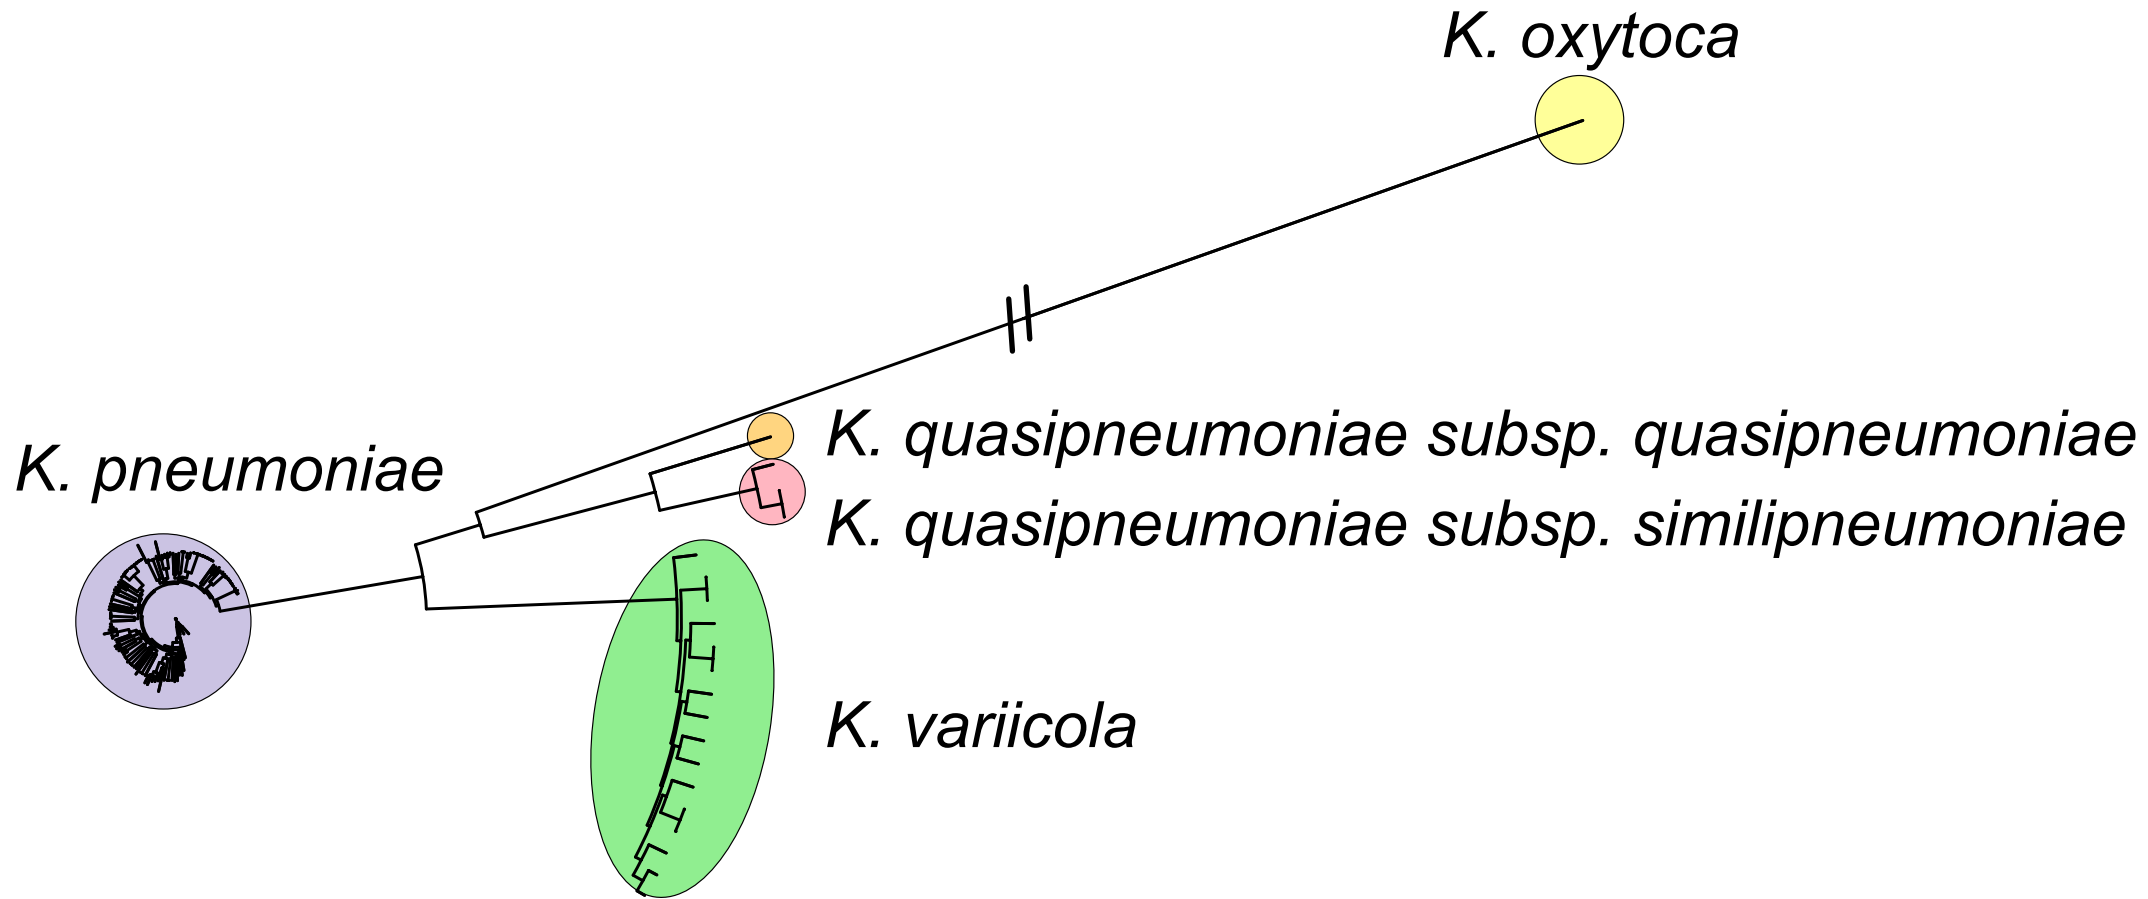

Tree scale: 1
