# Supplementary material
Source: PubMed Central journal article supplement (PMC9264654)
Supplement: 12879_2022_7558_MOESM5_ESM.pdf [file 12879_2022_7558_MOESM5_ESM.pdf]

Plasmid Group

- AA398
- AE437
- AA406
- AA454

*iuc1* plasmids

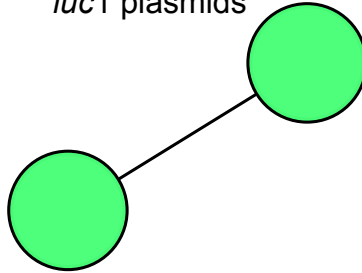

*iuc2* plasmids

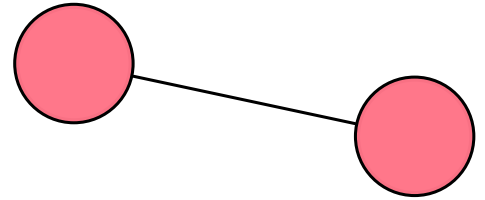

*iuc3* plasmids

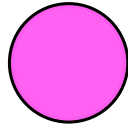

*ybt4* plasmids

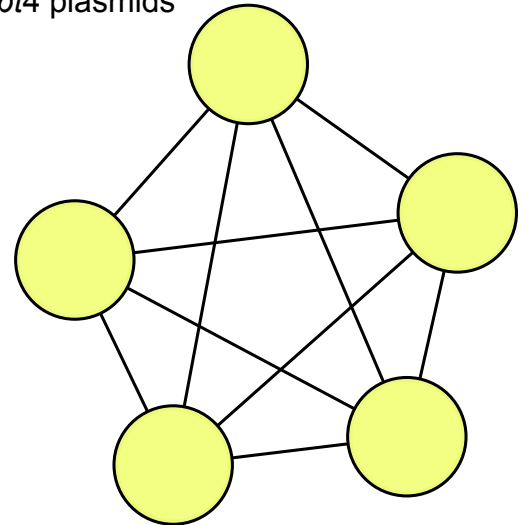

Minimum Jaccard index: 0.95
