# Supplementary material
Source: PubMed Central journal article supplement (PMC9264654)

A

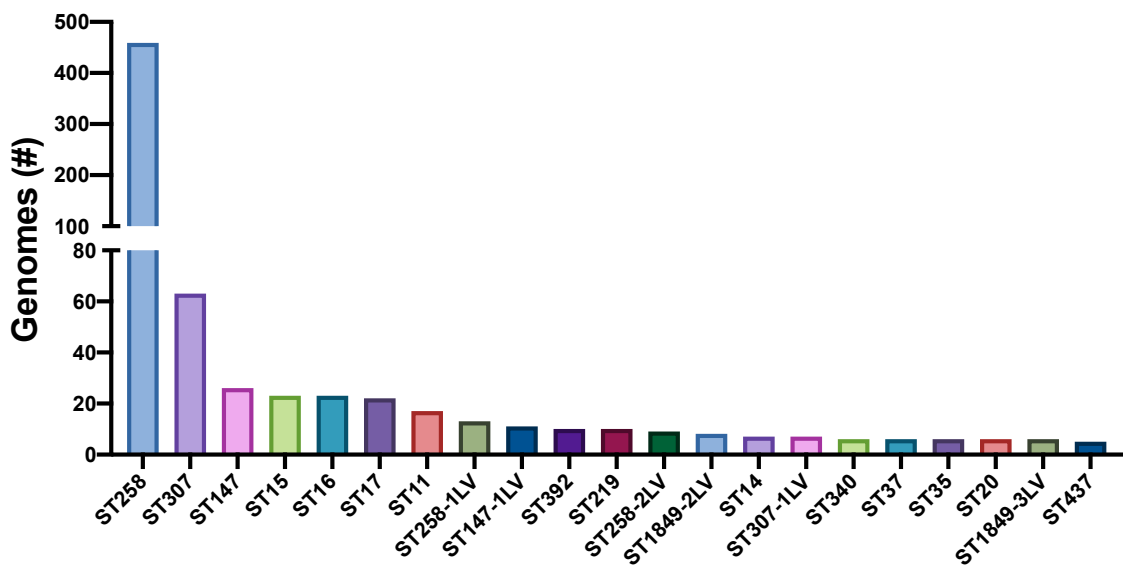

B

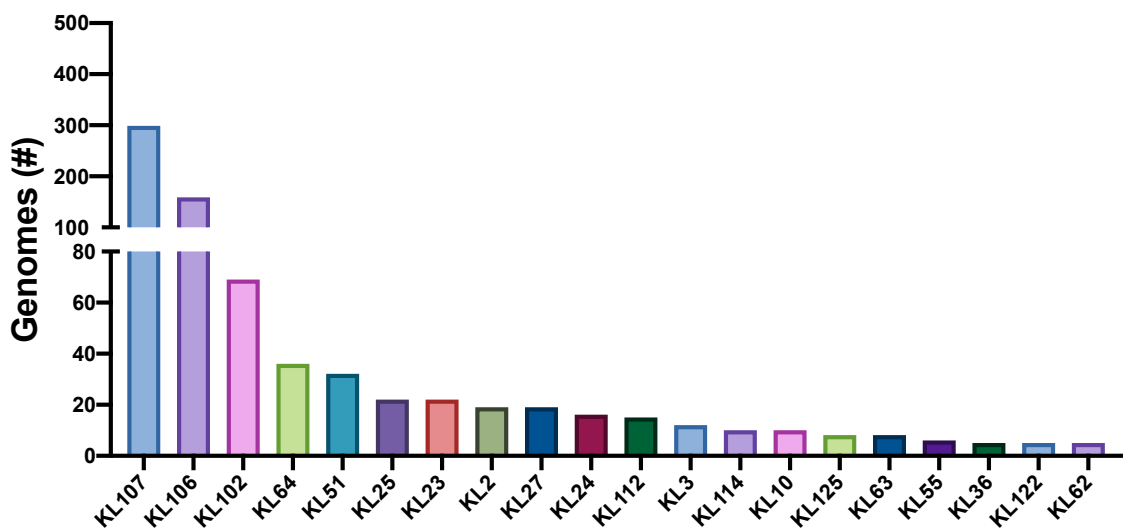

C

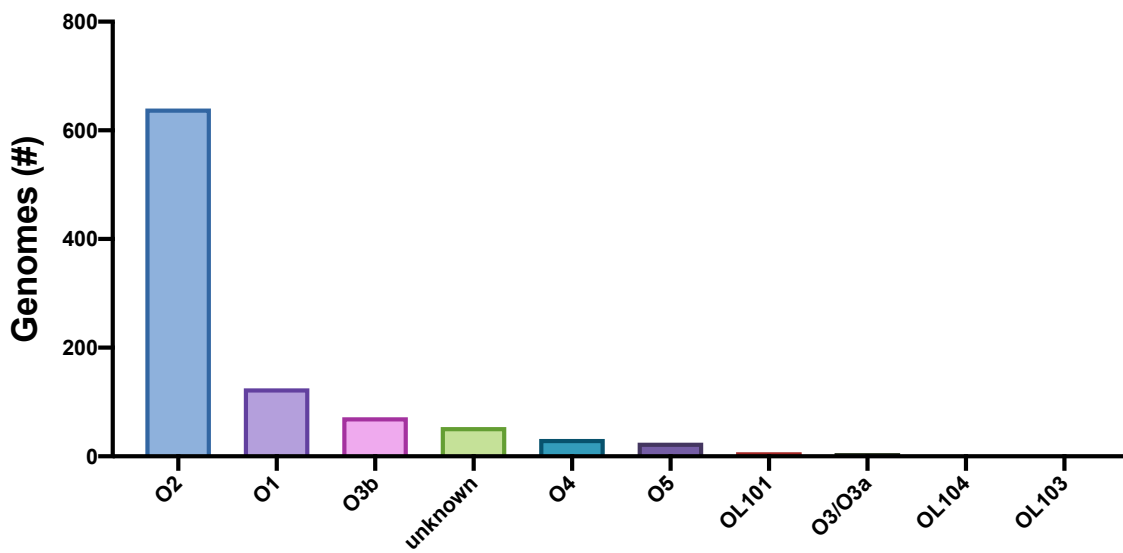

Supplement: 12879_2022_7558_MOESM10_ESM.pdf [file 12879_2022_7558_MOESM10_ESM.pdf]
