# Supplementary material
Source: PubMed Central journal article supplement (PMC9264654)
Supplement: 12879_2022_7558_MOESM12_ESM.pdf [file 12879_2022_7558_MOESM12_ESM.pdf]

A

*iuc1* plasmids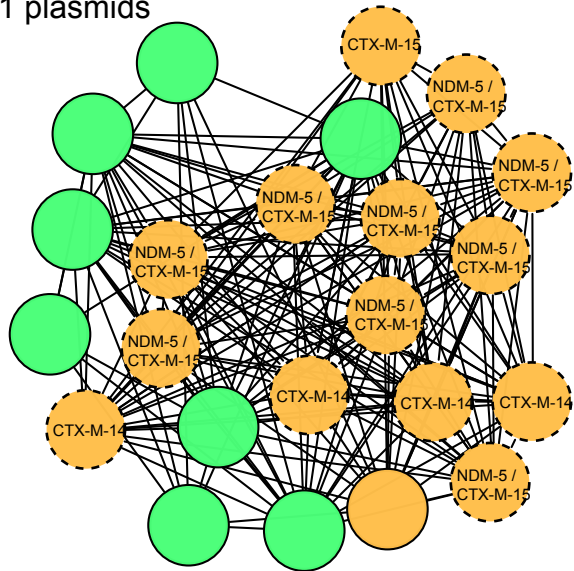

B

*iuc5* plasmids*iuc* unknown plasmids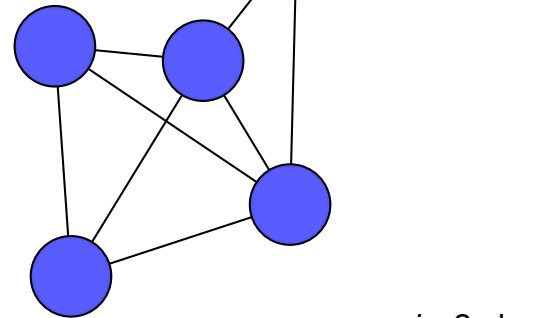

D

*iuc2* plasmids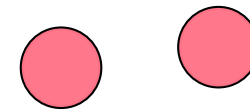

Minimum Jaccard index: 0.95

C

*ybt4* plasmids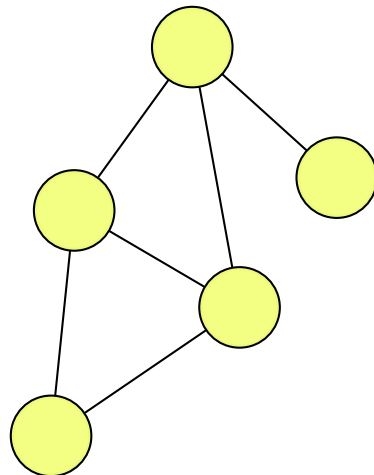

Plasmid Group

- AA398
- AE437
- AA405
- AA406
- AA454
- AA174
- AA021
- AA324
- hybrid plasmid
